# Supplementary material for: BCLAF1 binds SPOP to stabilize PD-L1 and promotes the development and immune escape of hepatocellular carcinoma
Source: Springer Nature journal article supplement (doi:10.1007/s00018-024-05144-z), 2024-02-10
Supplement: MOESM1 [file 18_2024_5144_MOESM1_ESM.pdf]

## **Supplementary Materials**

**Title:** BCLAF1 binds SPOP to stabilize PD-L1 and promote the development and immune escape of hepatocellular carcinoma

### **Authors:**

Zongdong Yu, Xiang Wu, Jie Zhu, Huan Yan, Yuxuan Li, Hui Zhang, Yeling Zhong, Man Lin, Ganghui Ye, Xinming Li, Jiabei Jin, Kailang Li, Jie Wang, Hui Zhuang, Ting Lin, Jian He, Changjiang Lu, Zeping Xu, Xie Zhang, Hong Li, Xiaofeng Jin

### **Correspondence:**

Hong Li, Email: lancet2017@163.com.

Xiaofeng Jin, Email: jinxiaofeng@nbu.edu.cn.

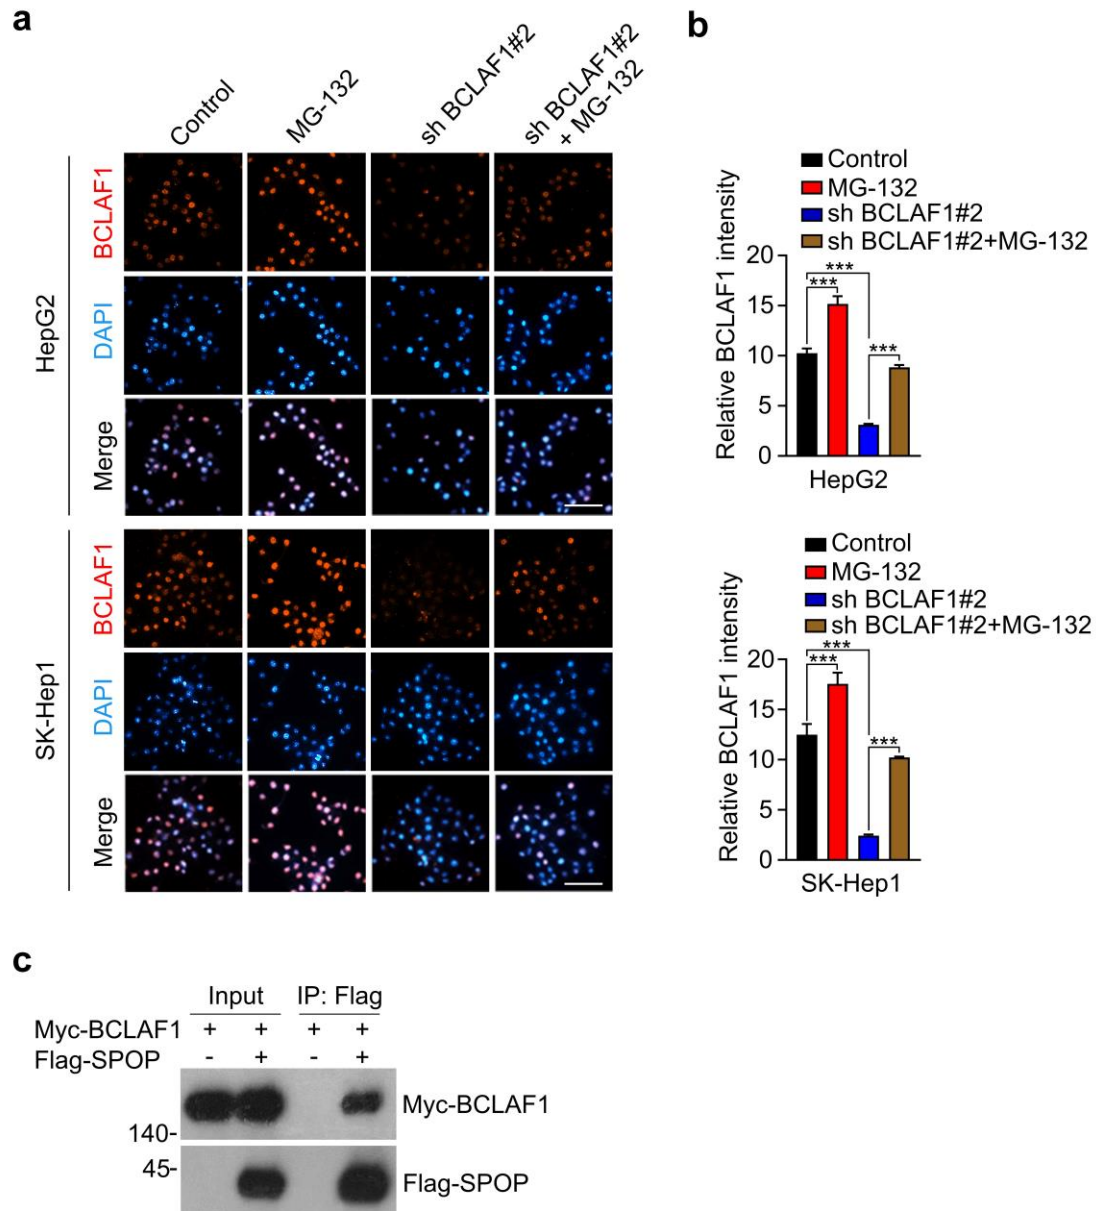

**Supplemental Fig. 1 Cellular immunofluorescence for BCLAF1 expression in HCC cells and Co-IP for BCLAF1-SPOP interaction**

**a** Representative images of Cell immunofluorescence for detection of BCLAF1 expression in HepG2 and SK-Hep1 cells. MG-132 (20  $\mu$ M) treatment for 8 h. Scale bar, 200  $\mu$ m. **b** Quantification of Cell immunofluorescence in (a). **c** Western blot of WCLs and Co-IP samples harvested from HEK-293T cells co-transfected with Myc-BCLAF1 and Flag-SPOP plasmids for 24 h. All data are shown as mean  $\pm$  SD (n = 3). \*\*\* $P$  <

0.001.

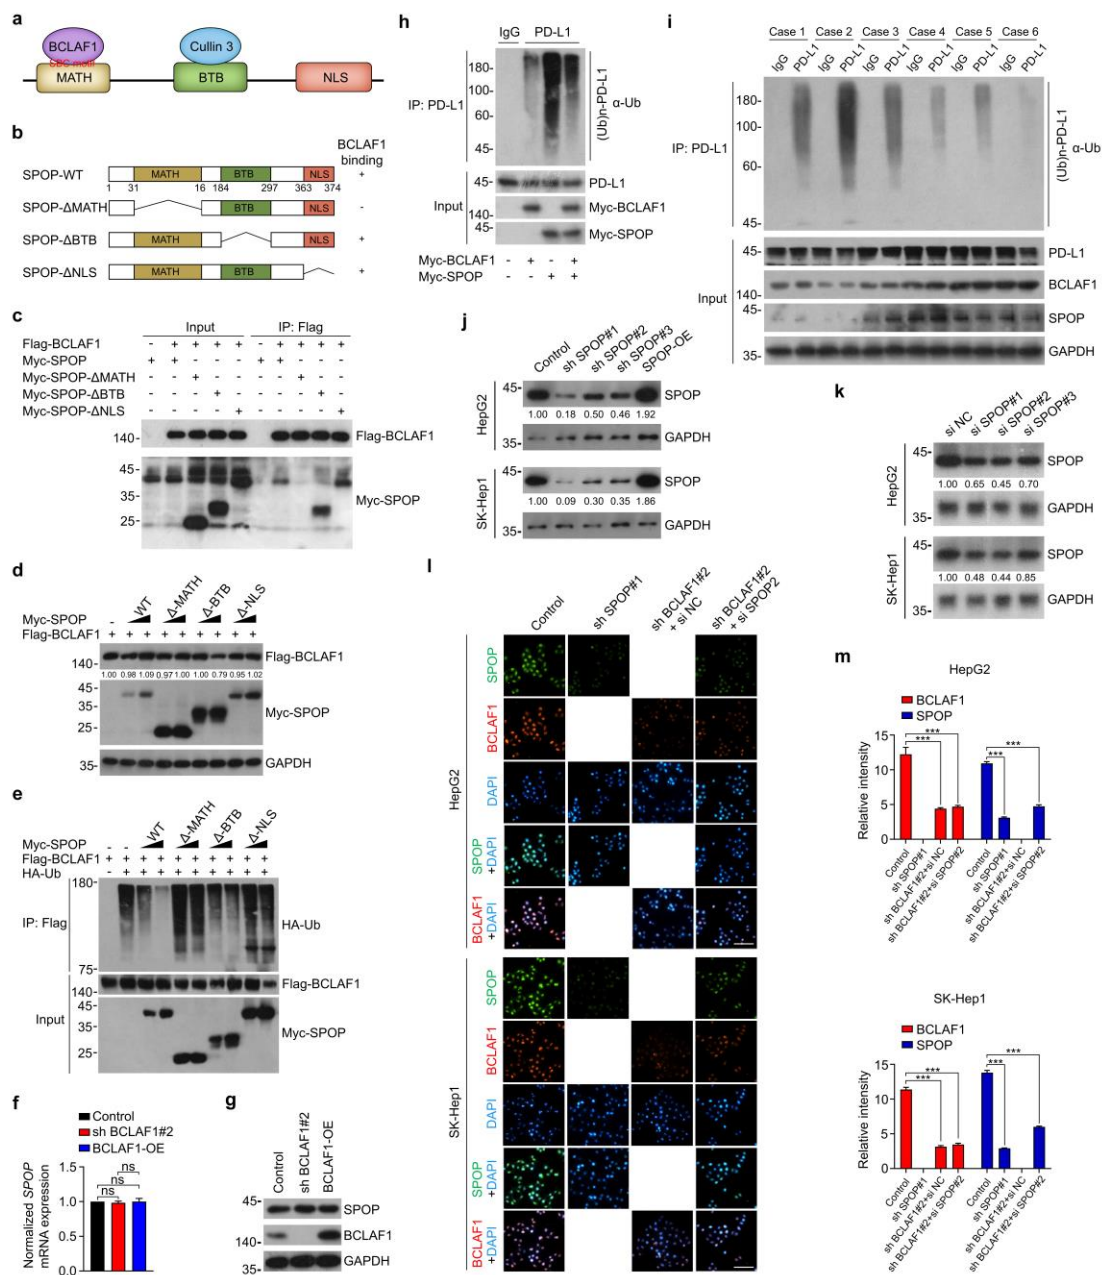

**Supplemental Fig. 2 Identification of the interacting structural domains of BCLAF1 and SPOP, effects of SPOP and BCLAF1 on each other's expression, ubiquitination assay of PD-L1 protein, Western blot of SPOP knockdown, and cellular immunofluorescence to detect BCLAF1 and SPOP expression in HCC cells**

**a** Diagram of the structure of the SPOP protein. **b** Schematic representation of SPOP deletion mutants. A binding capacity of SPOP to BCLAF1 is indicated with the symbol. **c** Western blot of the indicated proteins in WCLs and Co-IP samples of anti-Flag antibody obtained from HEK-293T cells transfected with indicated plasmids. **d** Western blot of WCLs from HEK-293T cells transfected with indicated plasmids. All quantitation were normalized to the protein levels of GAPDH in Control group. **e** Western blot of the products of *in vivo* ubiquitination assays performed using WCLs from HEK-293T cells transfected with the indicated plasmids. **f** qRT-PCR measurement of *SPOP* mRNA levels in BCLAF1-depleted and BCLAF1-overexpressed SK-Hep1 cells. **g** Western blot of WCLs from BCLAF1-depleted and BCLAF1-overexpressed SK-Hep1 cells. **h** SK-Hep1 cells were treated with MG-132 (20  $\mu$ M) for 8 h prior to lysis, and *in vivo* ubiquitination assays were performed using the antibodies shown to detect the effect of BCLAF1 on ubiquitination of endogenous PD-L1 mediated by SPOP. **i** Western blot of ubiquitination levels of PD-L1 in HCC tissues. **j** HepG2 and SK-Hep1 cells were infected with lentiviruses expressing SPOP-specific sh RNAs (sh SPOP#1, #2, #3), SPOP-specific overexpression (SPOP-OE), or a control (Control) of the same vector system for 72 h. After infection, WCLs were prepared and SPOP protein levels were determined by Western blot. All quantitation were normalized to the protein levels of GAPDH in Control group. **k** HepG2 and SK-Hep1 cells were transfected with si RNAs specifically targeting SPOP (si SPOP#1, #2, #3) or negative Control (si NC) for 24 h. WCLs were prepared and SPOP protein levels were determined by Western blot. All quantitation were normalized to the protein levels of GAPDH in Control group. **l**

Representative images of Cell immunofluorescence for detection of BCLAF1 and SPOP expression in HepG2 and SK-Hep1 cells. Scale bar, 200  $\mu$ m. **m** Quantification of Cell immunofluorescence in (l). All data are shown as mean  $\pm$  SD (n = 3). \*\*\* $P$  < 0.001, ns  $P \geq 0.05$ .

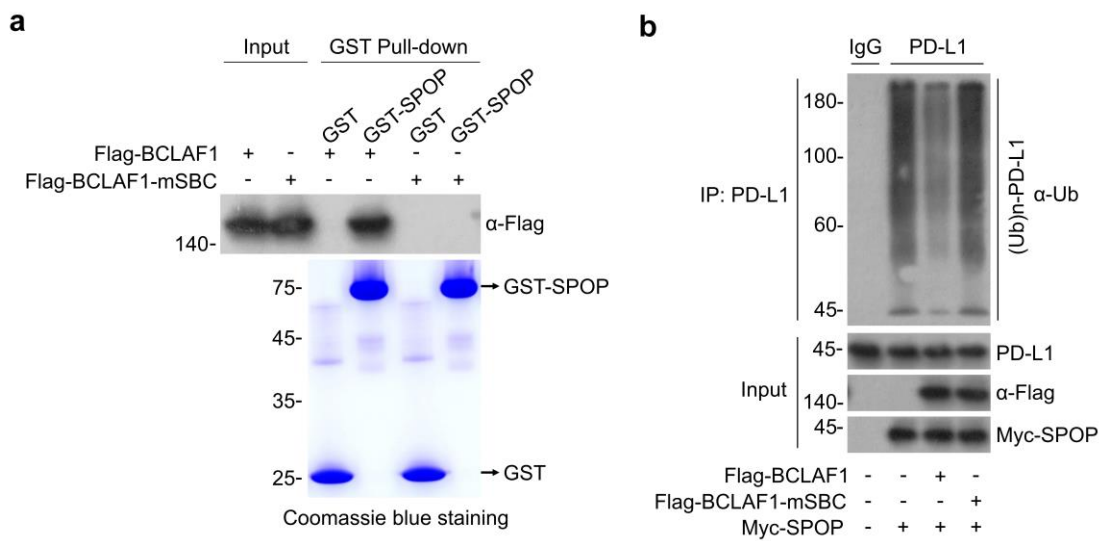

**Supplemental Fig. 3 GST pull-down and ubiquitination of endogenous PD-L1**

**a** Bacterially expressed GST-SPOP or GST bound glutathione-Sepharose beads and incubated with bacterially expressed Flag-BCLAF1 or Flag-BCLAF1-mSBC. Bound Flag-BCLAF1 or Flag-BCLAF1-mSBC was detected by Western blot with anti-Flag antibody. GST and GST-SPOP were detected by Western blot and Coomassie blue staining. **b** SK-Hep1 cells were treated with MG-132 (20  $\mu$ M) for 8 h prior to lysis, and *in vivo* ubiquitination assays were performed using the antibodies shown to detect the effect of BCLAF1-WT and BCLAF1-mSBC on ubiquitination of endogenous PD-L1 mediated by SPOP.

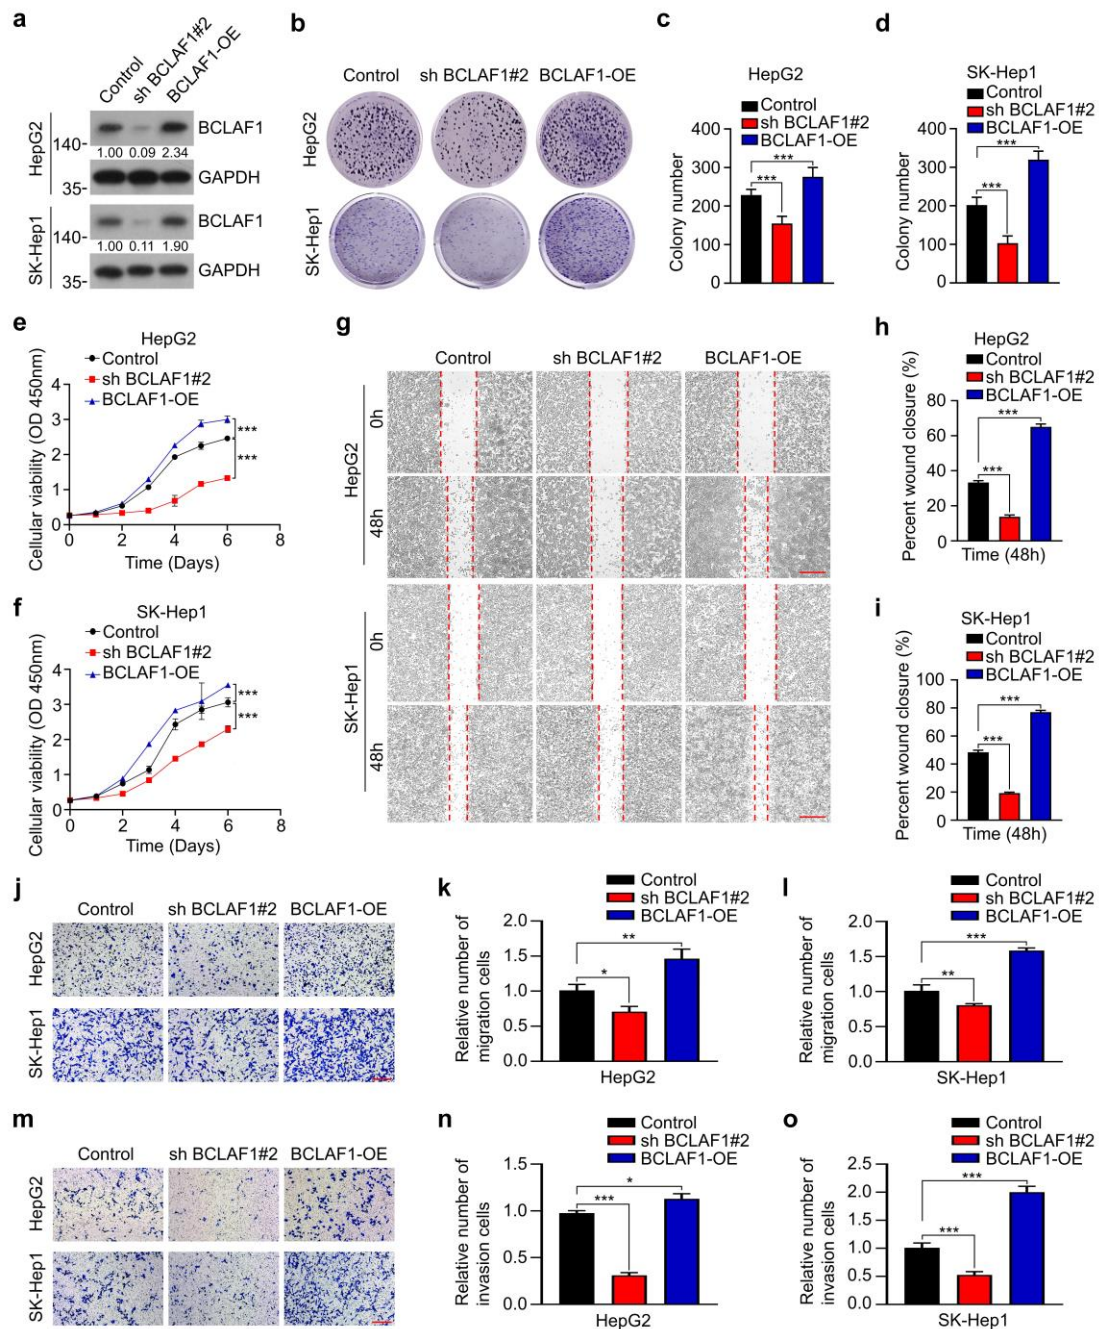

**Supplemental Fig. 4 BCLAF1 promotes the proliferation, migration and invasion of HCC cells**

**a** Western blot of WCLs from HepG2 and SK-Hep1 cells infected with lentivirus expressing the indicated sh RNAs and BCLAF1-overexpression. All quantitation were normalized to the protein levels of GAPDH in Control group. **b** Cell colony formation assay of HepG2 and SK-Hep1 cells infected with lentivirus expressing the indicated sh

RNA and BCLAF1-overexpression. **c, d** Statistics of colony number in **(b)**. **e, f** Cell proliferation assay of HepG2 cells **(e)** and SK-Hep1 cells **(f)** infected with lentivirus expressing the indicated sh RNA and BCLAF1-overexpression. **g** Wound healing assay of HepG2 and SK-Hep1 cells infected with lentivirus expressing the indicated sh RNA and BCLAF1-overexpression. Scale bar, 800  $\mu$ m. **h, i** Statistics of the rate of wound healing in **(g)**. **j** Cell migration assay of HepG2 and SK-Hep1 cells infected with lentivirus expressing the indicated sh RNA and BCLAF1-overexpression. Scale bar, 200  $\mu$ m. **k, l** Statistics of the number of cells migrated in **(j)**. **m** Cell invasion assay of HepG2 and SK-Hep1 cells infected with lentivirus expressing the indicated sh RNA and BCLAF1-overexpression. Scale bar, 200  $\mu$ m. **n, o** Statistics of the number of cells invaded in **(m)**. All data are shown as mean  $\pm$  SD ( $n = 3$ ).  $*P < 0.05$ ,  $**P < 0.01$ ,  $***P < 0.001$ .



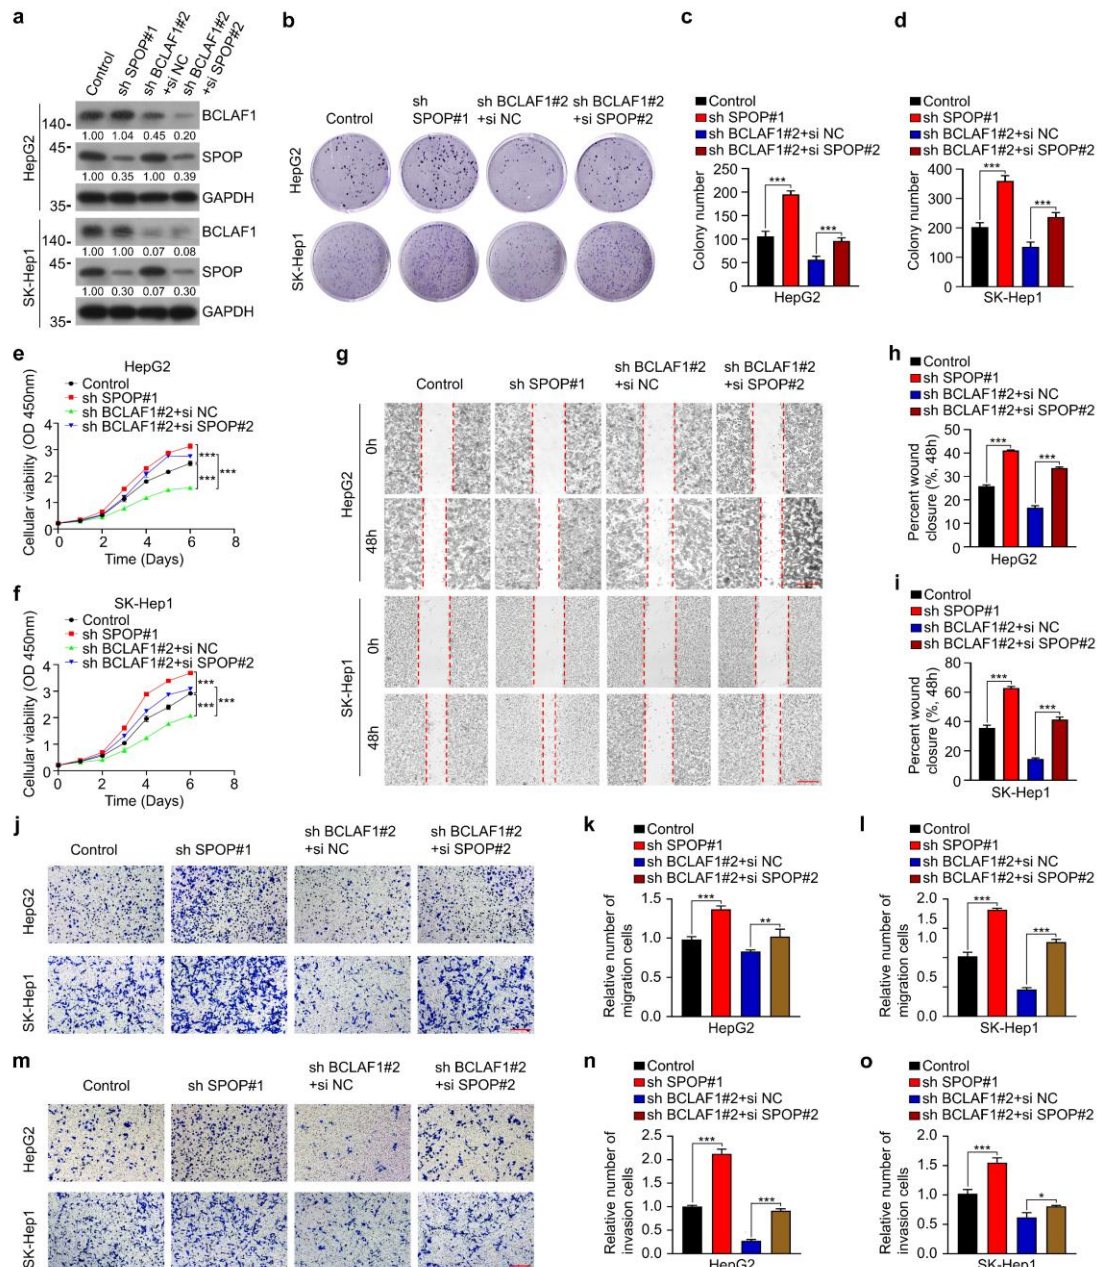

**Supplemental Fig. 5 BCLAF1 partly depends on SPOP to participate in the proliferation, migration and invasion of HCC cells**

**a** Western blot of WCLs from HepG2 and SK-Hep1 cells infected with lentivirus expressing the indicated sh RNAs and transfected with the indicated si RNAs. All quantitation were normalized to the protein levels of GAPDH in Control group. **b** Cell colony formation assay of HepG2 and SK-Hep1 cells infected with lentivirus



expressing the indicated sh RNAs and transfected with the indicated si RNAs. **c, d** Statistics of colony number in **(b)**. **e, f** Cell proliferation assay of HepG2 cells **(e)** and SK-Hep1 cells **(f)** infected with lentivirus expressing the indicated sh RNAs and transfected with the indicated si RNAs. **g** Wound healing assay of HepG2 and SK-Hep1 cells infected with lentivirus expressing the indicated sh RNAs and transfected with the indicated si RNAs. Scale bar, 800  $\mu\text{m}$ . **h, i** Statistics of the rate of wound healing in **(g)**. **j** Cell migration assay of HepG2 and SK-Hep1 cells infected with lentivirus expressing the indicated sh RNAs and transfected with the indicated si RNAs. Scale bar, 200  $\mu\text{m}$ . **k, l** Statistics of the number of cells migrated in **(j)**. **m** Cell invasion assay of HepG2 and SK-Hep1 cells infected with lentivirus expressing the indicated sh RNAs and transfected with the indicated si RNAs. Scale bar, 200  $\mu\text{m}$ . **n, o** Statistics of the number of cells invaded in **(m)**. All data are shown as mean  $\pm$  SD ( $n = 3$ ).  $*P < 0.05$ ,  $**P < 0.01$ ,  $***P < 0.001$ .

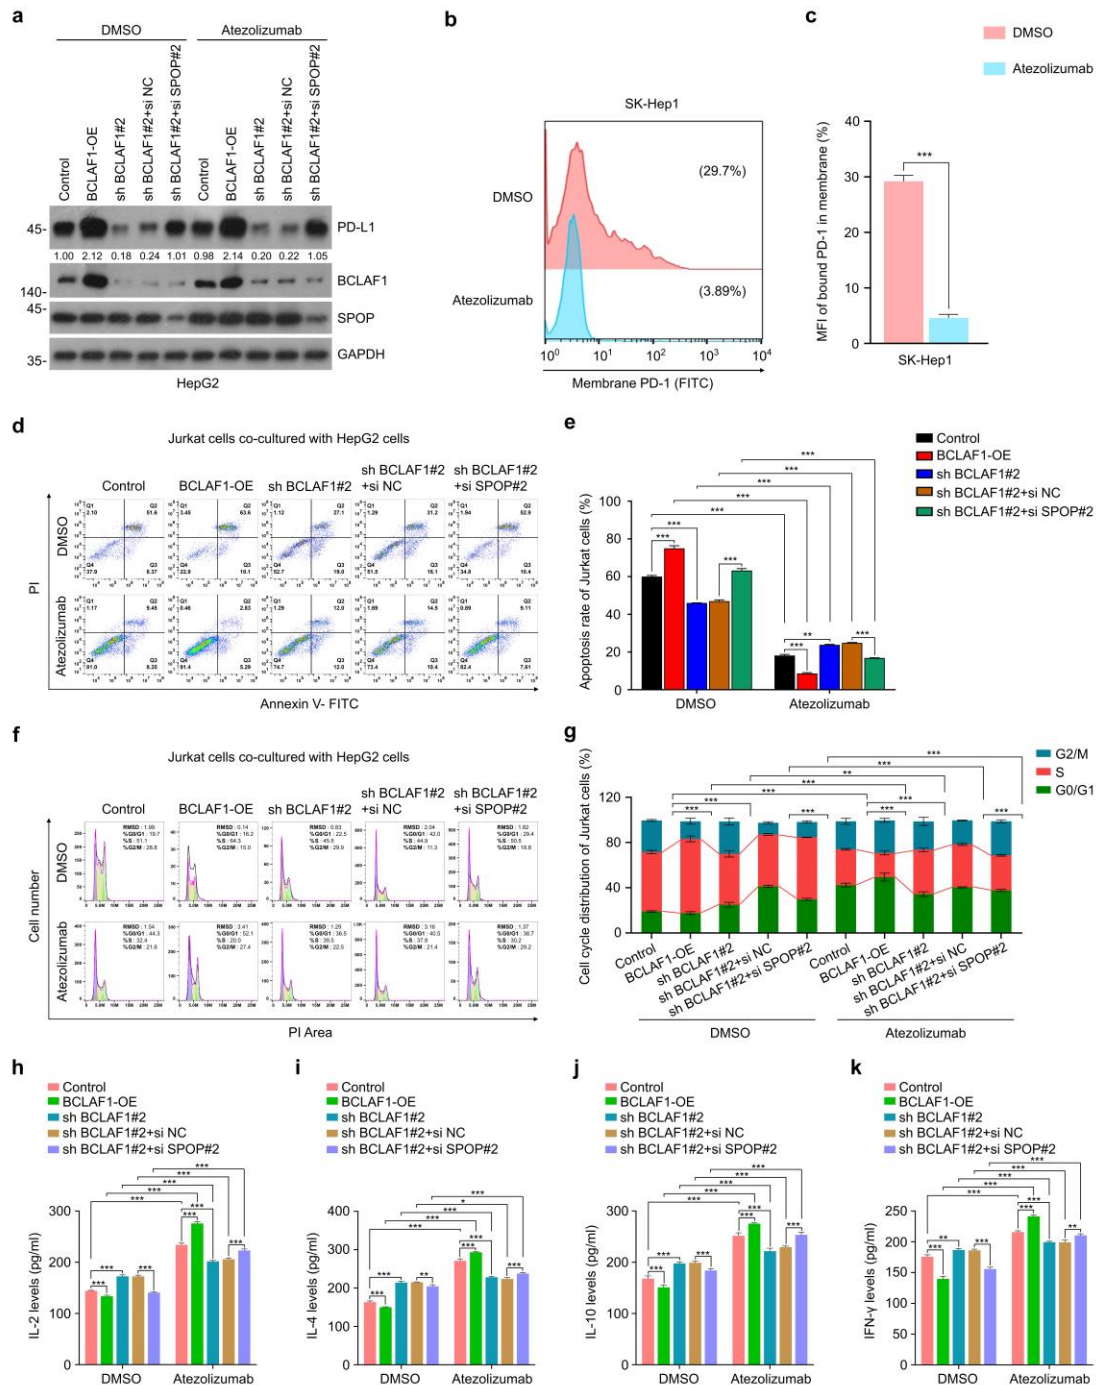

**Supplemental Fig. 6 BCLAF1 induces immune escape of HCC cells partly in an SPOP-PD-L1 axis-dependent manner**

**a** HepG2 cells achieving BCLAF1 overexpression, BCLAF1 knockdown, and BCLAF1 knockdown followed by SPOP knockdown were co-cultured with Jurkat cells for 24 h after treatment with DMSO or Atezolizumab (10 ng/mL). Western blot of

HepG2 cells in the HCC cell-Jurkat cells co-culture system for detection of PD-L1 expression levels. All quantitation were normalized to the protein levels of GAPDH in Control group. **b** Flow cytometry analysis of PD-1 binding on the surface of SK-Hep1 cells after treatment of co-culture system with 10 ng/mL Atezolizumab or DMSO for 24 h. **c** Statistics of mean fluorescence intensity (MFI) for PD-1 in (**b**). **d** HepG2 cells achieving BCLAF1 overexpression, BCLAF1 knockdown, and BCLAF1 knockdown followed by SPOP knockdown were co-cultured with Jurkat cells for 24 h after treatment with DMSO or Atezolizumab (10 ng/mL). Apoptosis levels of Jurkat cells were detected by Flow cytometry analysis. **e** Statistics of apoptotic levels of Jurkat cells in (**d**). **f** HepG2 cells achieving BCLAF1 overexpression, BCLAF1 knockdown, and BCLAF1 knockdown followed by SPOP knockdown were co-cultured with Jurkat cells for 24 h after treatment with DMSO or Atezolizumab (10 ng/mL). Cell cycle of Jurkat cells were detected by Flow cytometry analysis. **g** Statistics of cell cycle of Jurkat cells in (**f**). **h-k** HepG2 cells achieving BCLAF1 overexpression, BCLAF1 knockdown, and BCLAF1 knockdown followed by SPOP knockdown were co-cultured with Jurkat cells for 24 h after treatment with DMSO or Atezolizumab (10 ng/mL). The levels of IL-2 (**h**), IL-4 (**i**), IL-10 (**j**), and IFN- $\gamma$  (**k**) produced by Jurkat cells were detected by ELISA. All data are shown as mean  $\pm$  SD (n = 3). \* $P$  < 0.05, \*\* $P$  < 0.01, \*\*\* $P$  < 0.001.

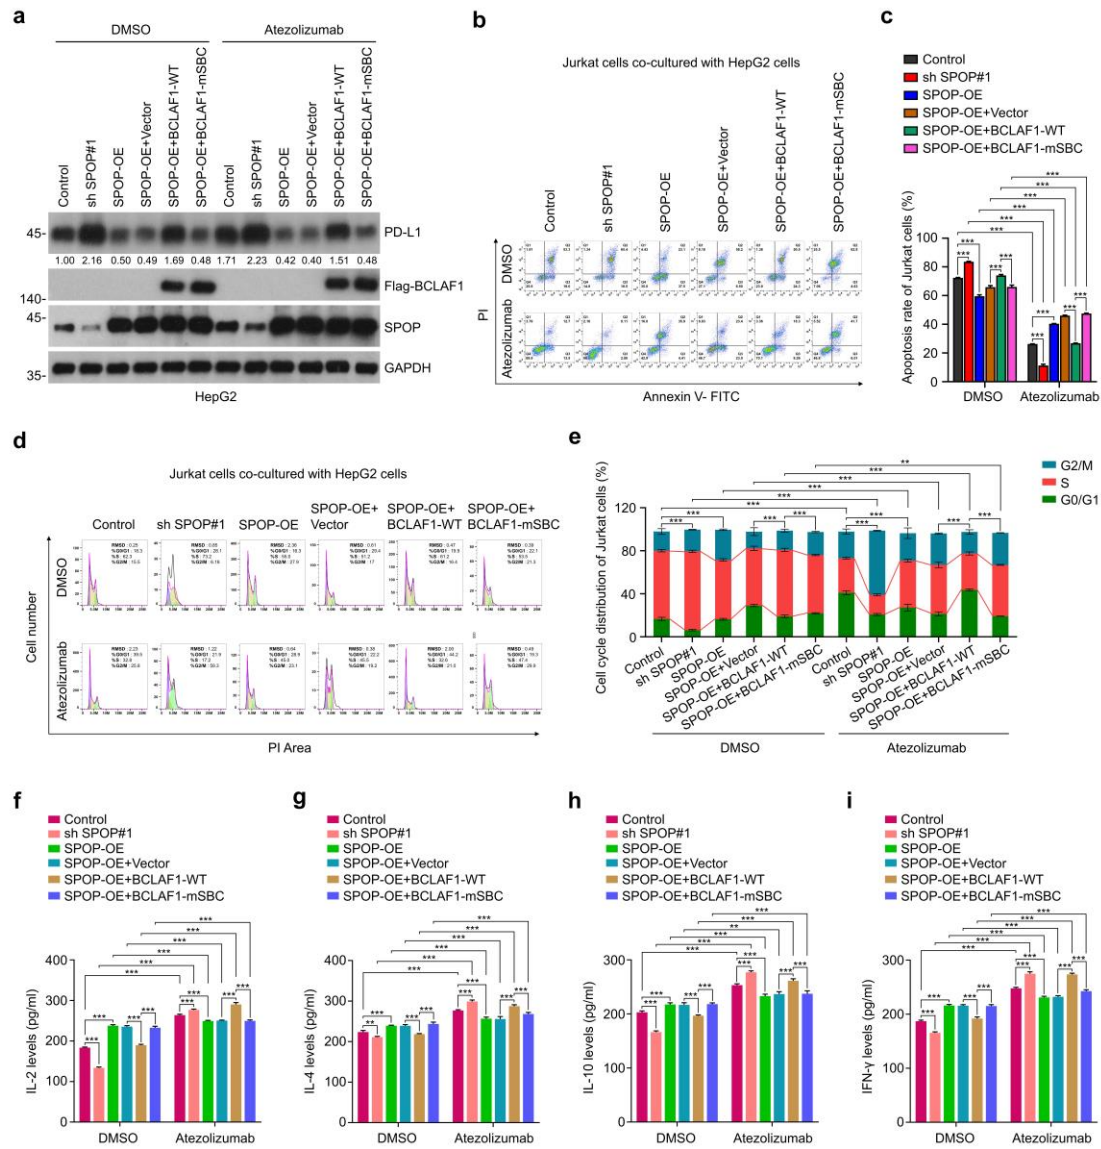

**Supplemental Fig. 7 SPOP-binding consensus (SBC) motif-associated BCLAF1 mutant is defective in inducing immune escape of HCC cells**

**a** HepG2 cells achieving SPOP knockdown, SPOP overexpression, and exogenous overexpression of BCLAF1-WT and BCLAF1-mSBC after SPOP overexpression were co-cultured with Jurkat cells for 24 h after treatment with DMSO or Atezolizumab (10 ng/mL). Western blot of HepG2 cells in the HCC cell-Jurkat cell co-culture system for detection of PD-L1 expression levels. All quantitation were normalized to the protein levels of GAPDH in Control group. **b** HepG2 cells achieving SPOP knockdown, SPOP

overexpression, and exogenous overexpression of BCLAF1-WT and BCLAF1-mSBC after SPOP overexpression were co-cultured with Jurkat cells for 24 h after treatment with DMSO or Atezolizumab (10 ng/mL). Apoptosis levels of Jurkat cells were detected by Flow cytometry analysis. **c** Statistics of apoptotic levels of Jurkat cells in **(b)**. **d** HepG2 cells achieving SPOP knockdown, SPOP overexpression, and exogenous overexpression of BCLAF1-WT and BCLAF1-mSBC after SPOP overexpression were co-cultured with Jurkat cells for 24 h after treatment with DMSO or Atezolizumab (10 ng/mL). Cell cycle of Jurkat cells were detected by Flow cytometry analysis. **e** Statistics of cell cycle of Jurkat cells in **(d)**. **f-i** HepG2 cells achieving SPOP knockdown, SPOP overexpression, and exogenous overexpression of BCLAF1-WT and BCLAF1-mSBC after SPOP overexpression were co-cultured with Jurkat cells for 24 h after treatment with DMSO or Atezolizumab (10 ng/mL). The levels of IL-2 (**f**), IL-4 (**g**), IL-10 (**h**), and IFN- $\gamma$  (**i**) produced by Jurkat cells were detected by ELISA. All data are shown as mean  $\pm$  SD (n = 3). \*\*P < 0.01, \*\*\*P < 0.001.



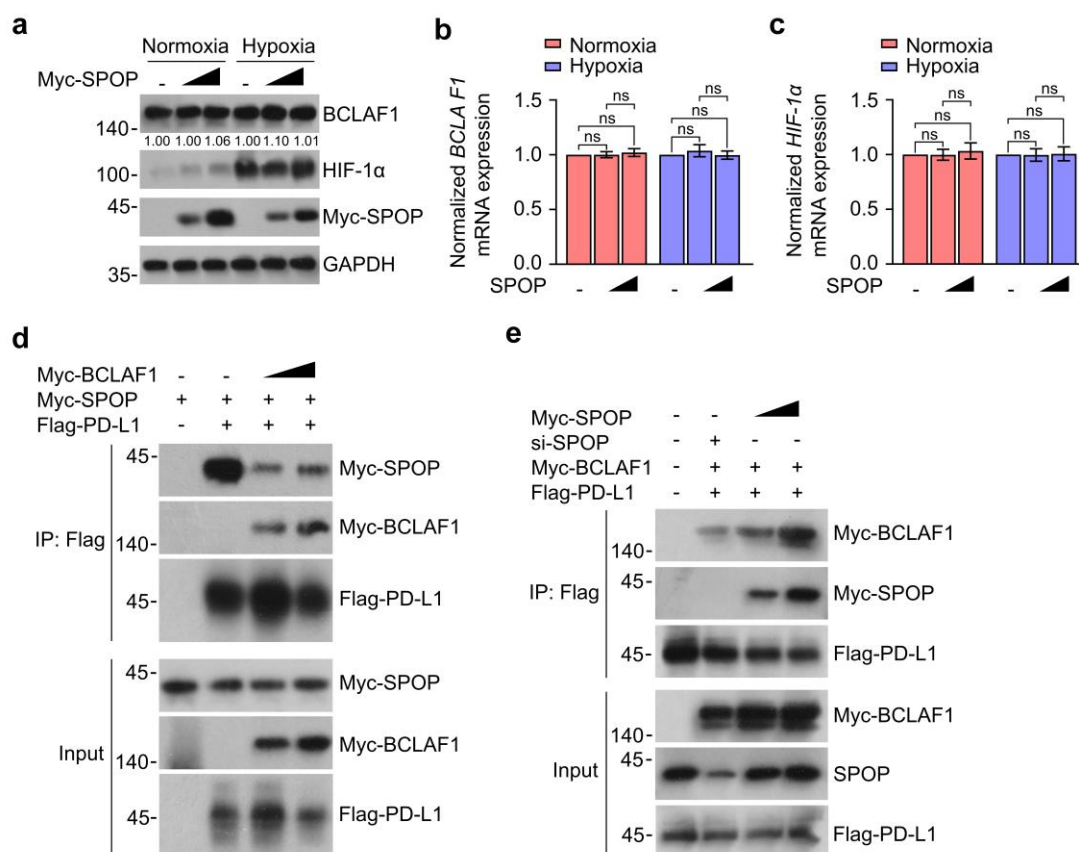

**Supplemental Fig. 8 Effect of SPOP on the expression levels of HIF-1α and BCLAF1, the effect of BCLAF1 on SPOP-PD-L1 interaction, and SPOP mediates the indirect interaction between BCLAF1 and PD-L1**

**a** Western blot of WCLs from SK-Hep1 cells treated with 200 μM Cocl<sub>2</sub> 24 h. All quantitation were normalized to the protein levels of GAPDH in the untransfected Myc-SPOP plasmid group. **b, c** qRT-PCR measurement of *BCLAF1* (**b**) and *HIF-1α* (**c**) mRNA levels in SK-Hep1 cells treated with 200 μM Cocl<sub>2</sub> 24 h. **d, e** Western blot of the indicated proteins in WCLs and Co-IP samples of anti-Flag antibody obtained from HEK-293T cells transfected with indicated plasmids. All data are shown as mean ± SD (n = 3). ns  $P \geq 0.05$ .

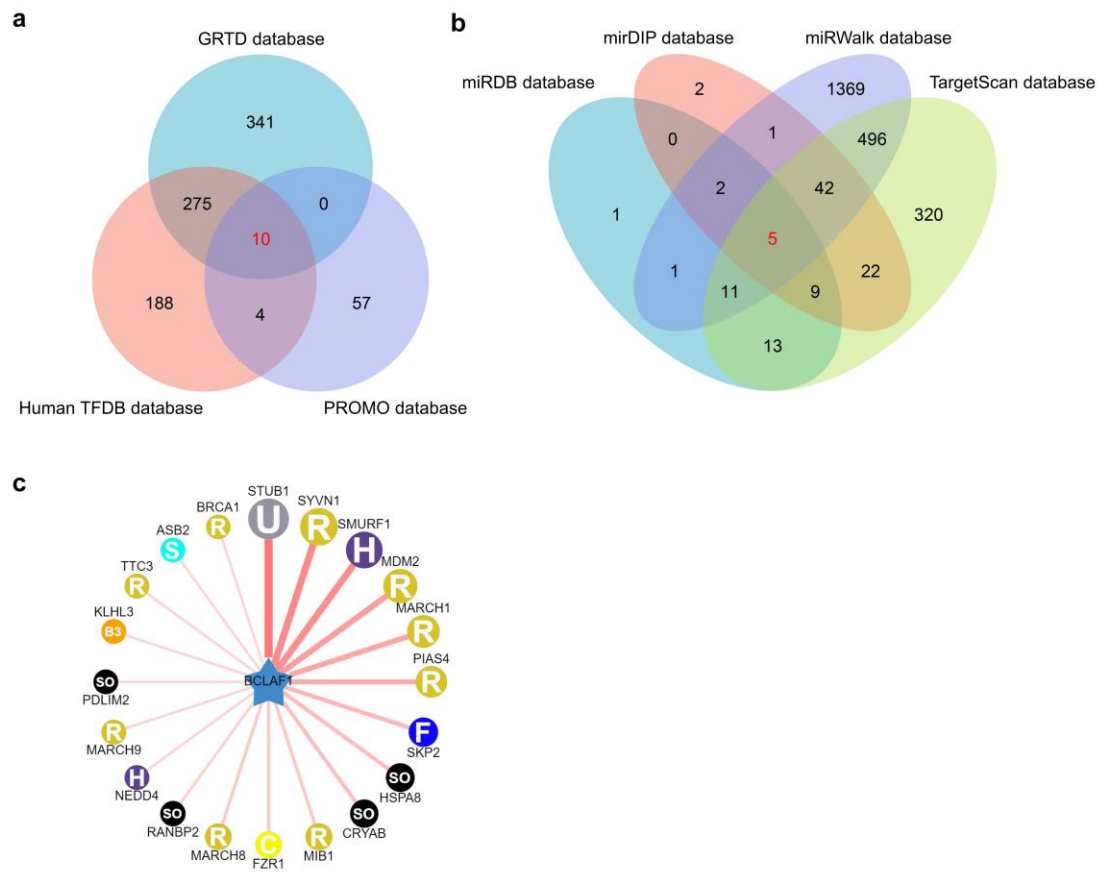

**Supplemental Fig. 9 Predicted upstream regulators of BCLAF1 at transcriptional, post-transcriptional, and post-translational levels**

**a** Ten potential transcription factors targeting BCLAF1 predicted by GRTD, HumanTFDB, and PROMO databases. **b** Five potential microRNAs (miRNAs) targeting BCLAF1 predicted by miRDB, mirDIP, miRWalk, and TargetScan databases. **c** Twenty potential E3 ubiquitin ligases targeting BCLAF1 were predicted by the ubibrowser 1.0 database.

**Supplemental Table 1.** 424 clinical characteristics of HCC patients from TCGA.

| Characteristic    | Low expression of<br>BCLAF1 | High expression of<br>BCLAF1 | <i>P</i> value |
|-------------------|-----------------------------|------------------------------|----------------|
| n                 | 187                         | 187                          |                |
| T stage           |                             |                              | 0.122          |
| T1                | 101                         | 82                           |                |
| T2                | 46                          | 49                           |                |
| T3                | 34                          | 46                           |                |
| T4                | 4                           | 9                            |                |
| N stag            |                             |                              | 0.622          |
| N0                | 127                         | 127                          |                |
| N1                | 1                           | 3                            |                |
| M stag            |                             |                              | 1              |
| M0                | 138                         | 130                          |                |
| M1                | 2                           | 2                            |                |
| Pathologic stage  |                             |                              | 0.181          |
| Stage I           | 96                          | 77                           |                |
| Stage II          | 45                          | 42                           |                |
| Stage III         | 35                          | 50                           |                |
| Stage IV          | 3                           | 2                            |                |
| Gender            |                             |                              | <b>0.002</b>   |
| Female            | 46                          | 75                           |                |
| Male              | 141                         | 112                          |                |
| Age               |                             |                              | <b>0.02</b>    |
| ≤60               | 77                          | 100                          |                |
| >60               | 110                         | 86                           |                |
| AFP(ng/ml)        |                             |                              | <b>0.011</b>   |
| ≤400              | 120                         | 95                           |                |
| >400              | 24                          | 41                           |                |
| Vascular invasion |                             |                              | 1              |
| No                | 105                         | 103                          |                |
| Yes               | 56                          | 54                           |                |

Abbreviations: T, tumor; N, node; M, metastasis; AFP, alpha-fetoprotein.

**Supplemental Table 2.** Predicted transcription factors targeting *BCLAF1* gene.

| Gene symbol   | Transcription factor | Position | Binding site |
|---------------|----------------------|----------|--------------|
| <i>BCLAF1</i> | AR                   | Promoter | 252          |
| <i>BCLAF1</i> | YY1                  | Promoter | 80           |
| <i>BCLAF1</i> | TBP                  | Promoter | 33           |
| <i>BCLAF1</i> | VDR                  | Promoter | 16           |
| <i>BCLAF1</i> | POU2F1               | Promoter | 14           |
| <i>BCLAF1</i> | POU2F2               | Promoter | 14           |
| <i>BCLAF1</i> | ATF3                 | Promoter | 11           |
| <i>BCLAF1</i> | STAT4                | Promoter | 9            |
| <i>BCLAF1</i> | STAT5A               | Promoter | 7            |
| <i>BCLAF1</i> | WT1                  | Promoter | 5            |

**Supplemental Table 3.** Predicted microRNA (miRNA) s targeting *BCLAF1* gene.

| Gene symbol   | MiRNA           | Position | Binding site |
|---------------|-----------------|----------|--------------|
| <i>BCLAF1</i> | hsa-miR-514b-5p | 3' UTR   | 4            |
| <i>BCLAF1</i> | hsa-miR-513c-5p | 3' UTR   | 4            |
| <i>BCLAF1</i> | hsa-miR-513a-3p | 3' UTR   | 3            |
| <i>BCLAF1</i> | hsa-miR-625-5p  | 3' UTR   | 3            |
| <i>BCLAF1</i> | hsa-miR-181a-5p | 3' UTR   | 2            |

**Supplemental Table 4.** Predicted E3 ligases targeting BCLAF1 protein.

| E3 ligase | Substrate | Confidence score |
|-----------|-----------|------------------|
| STUB1     | BCLAF1    | 0.781            |
| SYVN1     | BCLAF1    | 0.746            |
| SMURF1    | BCLAF1    | 0.738            |
| MDM2      | BCLAF1    | 0.71             |
| MARCH1    | BCLAF1    | 0.694            |
| PIAS4     | BCLAF1    | 0.682            |
| SKP2      | BCLAF1    | 0.661            |
| HSPA8     | BCLAF1    | 0.653            |
| CRYAB     | BCLAF1    | 0.649            |
| MIB1      | BCLAF1    | 0.633            |
| FZR1      | BCLAF1    | 0.63             |
| MARCH8    | BCLAF1    | 0.63             |
| RANBP2    | BCLAF1    | 0.617            |
| NEDD4     | BCLAF1    | 0.611            |
| MARCH9    | BCLAF1    | 0.61             |
| PDLIM2    | BCLAF1    | 0.61             |
| KLHL3     | BCLAF1    | 0.61             |
| TTC3      | BCLAF1    | 0.61             |
| ASB2      | BCLAF1    | 0.608            |
| BRCA1     | BCLAF1    | 0.606            |

**Supplemental Table 5.** Antibody information.

| No | Antibody    | Cytokine Species | Cat. No    | Source      | Application/<br>Dilutions           |
|----|-------------|------------------|------------|-------------|-------------------------------------|
| 1  | Anti-PD-L1  | Mouse            | 66248-1-Ig | Proteintech | IB: 1:1000<br>IF:1:50<br>IHC:1:250  |
| 2  | Anti-BCLAF1 | Mouse            | 67860-1-Ig | Proteintech | IB: 1:8000<br>IF:1:100<br>IHC:1:250 |
| 3  | Anti-SPOP   | Rabbit           | 16750-1AP  | Proteintech | IB: 1:5000<br>IF:1:100<br>IHC:1:250 |
| 4  | Anti-Flag   | Mouse            | M185-7     | MBL         | IB: 1:4000                          |
| 5  | Anti-Myc    | Mouse            | M192-7     | MBL         | IB: 1:5000                          |
| 6  | Anti-HA     | Mouse            | M180-7     | MBL         | IB: 1:5000                          |
| 7  | Anti-Flag   | Mouse            | 66008-4-Ig | Proteintech | IF: 1:500                           |
| 8  | Anti-HA     | Rabbit           | 81290-1-   | Proteintech | IF: 1:250                           |

|                                                                                                                |                          |        | RR         |                          |                         |
|----------------------------------------------------------------------------------------------------------------|--------------------------|--------|------------|--------------------------|-------------------------|
| 9                                                                                                              | Anti-HIF-1 $\alpha$      | Rabbit | 20960-1-AP | Proteintech              | IB: 1:2500              |
| 10                                                                                                             | Anti-GAPDH               | Rabbit | AC001      | Abclonal                 | IB: 1:8000              |
| 11                                                                                                             | Anti-Mouse               | Donkey | AS033      | Abclonal                 | IB: 1:8000<br>IHC:1:200 |
| 12                                                                                                             | Anti-Rabbit              | Donkey | AS038      | Abclonal                 | IB: 1:8000<br>IHC:1:200 |
| 13                                                                                                             | Anti-Rabbit-488          | Donkey | AS035      | Abclonal                 | IF: 1:200               |
| 14                                                                                                             | Anti-Mouse-Cy3           | Goat   | AS008      | Abclonal                 | IF: 1:250               |
| 15                                                                                                             | Anti-Flag beads          | Mouse  | M2         | Sigma                    | IP                      |
| 16                                                                                                             | Anti-Alexa Fluor 488 dye | Goat   | A-11013    | Thermo Fisher Scientific | FC                      |
| IB: Immunoblot; IF: Immunofluorescence; IHC: immunohistochemistry; IP: Immunoprecipitation; FC, Flow Cytometry |                          |        |            |                          |                         |

| <b>Supplemental Table 6. Chemicals.</b> |                           |          |                |
|-----------------------------------------|---------------------------|----------|----------------|
| No                                      | Name                      | Cat. No  | Source         |
| 1                                       | Atezolizumab              | HY-P9904 | MedChemExpress |
| 2                                       | MG-132g                   | S2619    | Selleckchem    |
| 3                                       | CHX                       | S7418    | Selleckchem    |
| 4                                       | Puromycin                 | S7417    | Selleckchem    |
| 5                                       | Mitomycin C               | GC12353  | GLPBIO         |
| 6                                       | Cocl <sub>2</sub>         | C804815  | Macklin        |
| 7                                       | CD3/CD28 T-cell activator | KMS310   | Proteintech    |

| <b>Supplemental Table 7. Primers and si RNA/sh RNA sequence information.</b> |                                 |                               |
|------------------------------------------------------------------------------|---------------------------------|-------------------------------|
| <b>Quantitative RT-PCR primers</b>                                           |                                 |                               |
| Gene                                                                         | F:5'-3'                         | R:5'-3'                       |
| BCLAF1                                                                       | CGCGTCGAAGGTAG<br>CTCTAT        | TTGGAGCGACCCATT<br>TCTTTT     |
| PD-L1                                                                        | CCTACTGGCATTTCG<br>TGAACGCAT    | TTTGCTGAACGCCCC<br>ATACA      |
| HIF-1 $\alpha$                                                               | GAAAGCGCAAGTC<br>CTCAAAG        | TGGGTAGGAGATGG<br>AGATGC      |
| SPOP                                                                         | TGACCACCAGGTA<br>GACAGCG        | CCCGTTTCCCCCAA<br>GTTA        |
| GAPDH                                                                        | CATGGCCTTCCGTG<br>TTCCTA        | CCCTCAGATGCCTGC<br>TTCA       |
| <b>Primers for BCLAF1 mutant construction</b>                                |                                 |                               |
| Gene                                                                         | F:5'-3'                         | R:5'-3'                       |
| BCLAF1-mSBC                                                                  | TCTGCAGCCGCAGC<br>CGCTTCTCGTTCT | CCTAGAAGATCTATA<br>TGACCGGCGA |
| <b>Sequences of sh RNA oligonucleotide</b>                                   |                                 |                               |
| Gene                                                                         | F:5'-3'                         | R:5'-3'                       |
| BCLAF1#1                                                                     | CACCGCCACTGAAGA                 | CGGTGACTTCTTGTAT              |



|                             |                                                                 |                                                                |
|-----------------------------|-----------------------------------------------------------------|----------------------------------------------------------------|
|                             | ACATAGTACTCGAAA<br>GTACTATGTTCTTCAG<br>TGGC                     | CATGAGCTTTCATGAT<br>ACAAGAAGTCACCGA<br>AAA                     |
| BCLAF1#2                    | CACCGCACTTCAGAG<br>TCATTTATTCCGAAGA<br>ATAAATGACTCTGAA<br>GTGC  | CGTGAAGTCTCAGTA<br>AATAAGGCTTCTTATT<br>TACTGAGACTTCACG<br>AAAA |
| BCLAF1#3                    | CACCGCTAGTACACT<br>TGTCCATTCTCGAAA<br>GAATGGACAAGTGTA<br>CTAGC  | CGATCATGTGAACAG<br>GTAAGAGCTTTCTTA<br>CCTGTTACATGATCG<br>AAAA  |
| SPOP#1                      | CACCGGATTTTCATCA<br>ACTATCATGCCGAAG<br>CATGATAGTTGATGA<br>AATCC | CCTAAAGTAGTTGAT<br>AGTACGGCTTCGTAC<br>TATCAACTACTTTAGG<br>AAAA |
| SPOP#2                      | CACCGCAGTGGATTT<br>CATCAACTATCGAAAT<br>AGTTGATGAAATCCA<br>CTGC  | CGTCACCTAAAGTAG<br>TTGATAGCTTTATCAA<br>CTACTTTAGGTGACG<br>AAAA |
| SPOP#3                      | CACCGCGCTTAAAGG<br>TCATGTGTGACGAAT<br>CACACATGACCTTTA<br>AGCGC  | CGCGAATTTCCAGTA<br>CACACTGCTTAGTGT<br>GTACTGGAAATTCGC<br>GAAAA |
| <b>Sequences of si RNAs</b> |                                                                 |                                                                |
| <b>Gene</b>                 | <b>F:5'-3'</b>                                                  | <b>R:5'-3'</b>                                                 |
| SPOP#1                      | ACUCAGGCAGUGGA<br>UUUCAUCAACU                                   | AGUUGAUGAAAUCC<br>ACUGCCUGAGU                                  |
| SPOP#2                      | GGGCUUCUCCUGA<br>UGACAAGCUUA                                    | UAAGCUUGUCAUCA<br>GGGAGAAGCCC                                  |
| SPOP#3                      | GGGCAUAUAGGUUU<br>GUGCAAGGCAA                                   | UUGCCUUGCACAAA<br>CCUAUAUGCCC                                  |
